# Supplementary material
Source: PubMed Central journal article supplement (PMC3930308)
Supplement: ismej2013164x1.pdf [file ismej2013164x1.pdf]

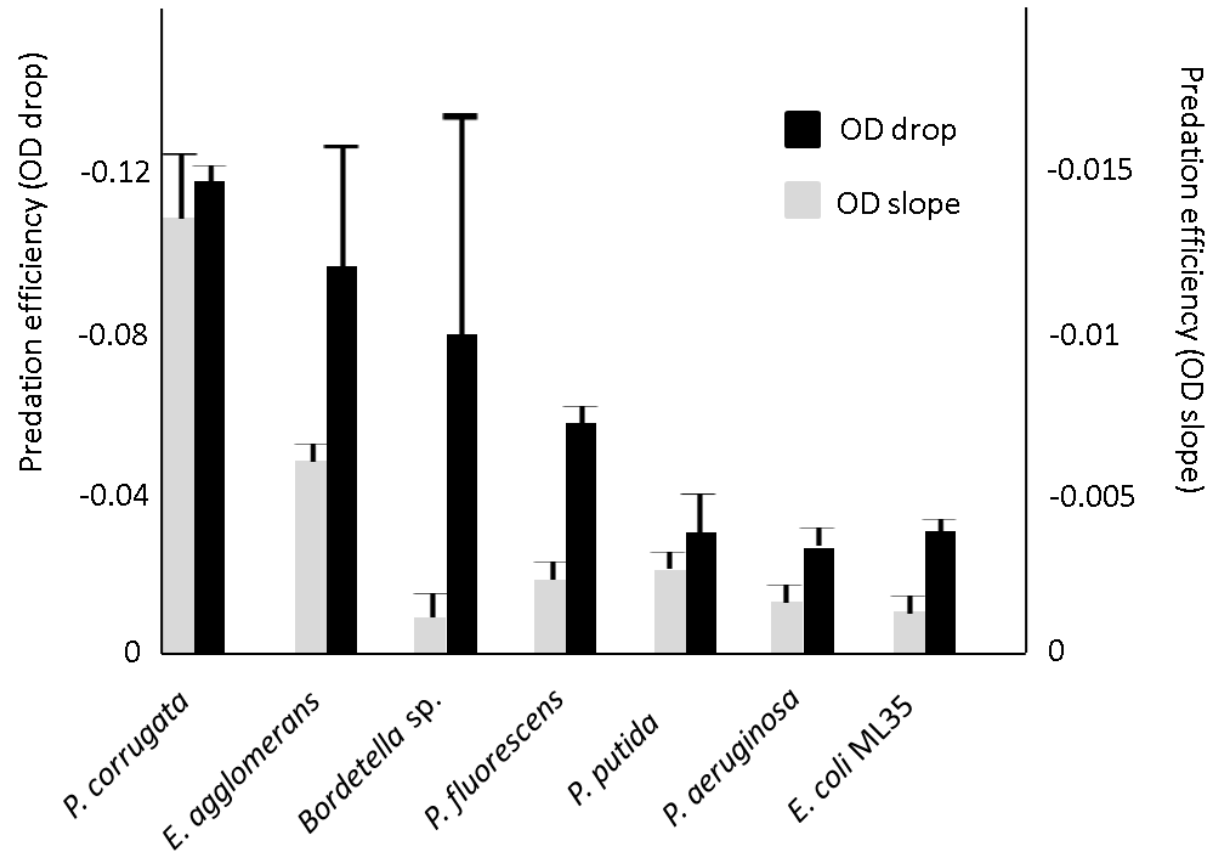

Supplementary figure S1. Growth of *Micavibrio aeruginosavorus* EPB on various prey. The left Y axis (black bars) shows the highest 6-hour drop values in OD; the right Y axis (grey bars) shows the gradient (slope) values of the predation curves.
