# Supplementary material
Source: PubMed Central journal article supplement (PMC3930308)
Supplement: ismej2013164x2.pdf [file ismej2013164x2.pdf]

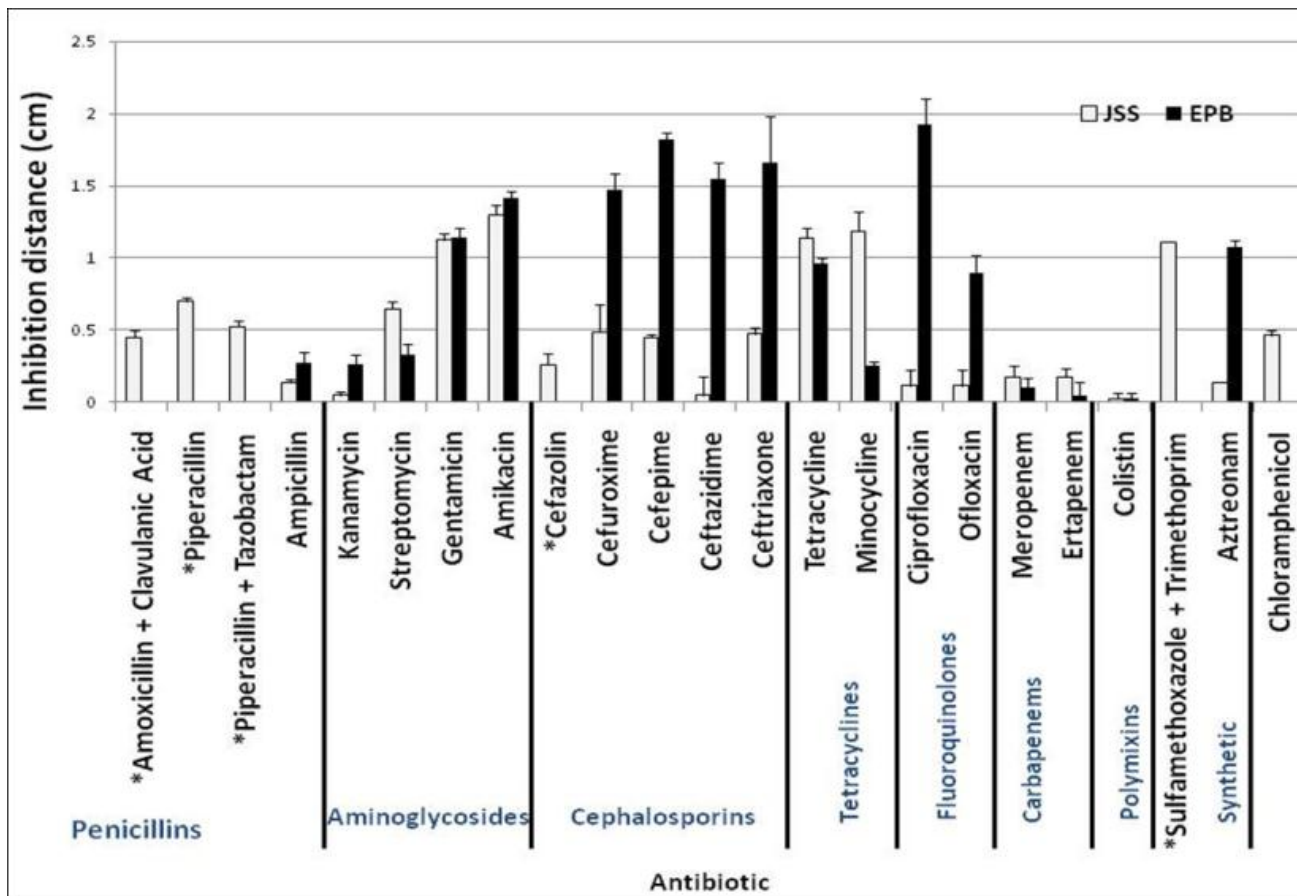

Supplementary figure S2. Antibiotic resistance spectra of *M. aeruginosavorus* EPB and *Bdellovibrio exovorus* JSS.
