# Supplementary material
Source: PubMed Central journal article supplement (PMC3930308)
Supplement: ismej2013164x5.pdf [file ismej2013164x5.pdf]

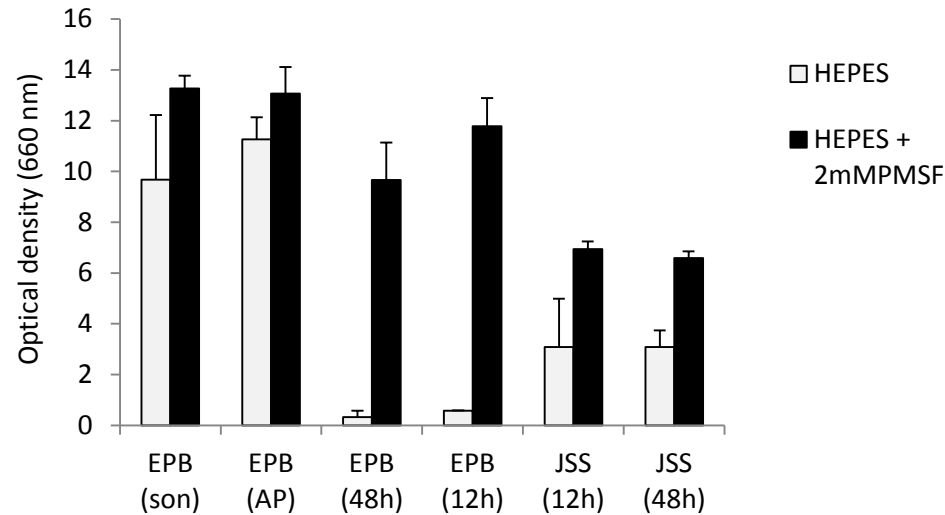

Supplementary figure S5. casein degradation assay. AP cells were sonicated (son) or suspended for 24 h in HEPES buffer (AP). AP cell extracts, AP cells suspensions and lytic cultures of both *M. aeruginosavorus* EPB and *B. exovorius* JSS (after 12 and 48 h of coculture with prey) were filtered and added to a skim milk suspension. PMSF is an inhibitor of serine proteases. Control samples (HEPES buffer added, n=10) yielded an average OD = 11.9.
