# Supplementary material
Source: PubMed Central journal article supplement (PMC3930308)
Supplement: ismej2013164x6.pdf [file ismej2013164x6.pdf]

1 Supplementary Table S1: Antibiotics used in the antibiotic resistance tests.

2

| <b>Antibiotic</b>                          | <b>Concentration in growth medium (<math>\mu\text{g/ml}</math>)</b> |
|--------------------------------------------|---------------------------------------------------------------------|
| Ceftazidime                                | 30                                                                  |
| Minocycline                                | 30                                                                  |
| Aztreonam                                  | 30                                                                  |
| Ertapenem                                  | 10                                                                  |
| Ofloxacin                                  | 5                                                                   |
| Cefepime                                   | 30                                                                  |
| Ampicillin (100mg/ml in water)             | 10 (50)                                                             |
| Cefazolin                                  | 30                                                                  |
| Ciprofloxacin                              | 5                                                                   |
| Piperacillin + Tazobactam                  | 100 + 10                                                            |
| Gentamicin                                 | 10                                                                  |
| Tetracycline (10mg/ml in 50% ethanol)      | 30 (12.5)                                                           |
| Chloramphenicol (10 mg/ml in 100% ethanol) | 30                                                                  |
| Amikacin                                   | 30                                                                  |
| Cefuroxime                                 | 30                                                                  |
| Piperacillin                               | 100                                                                 |
| Sulfamethoxazole + Trimethoprim            | 23.75 + 1.25                                                        |
| Ceftriaxone                                | 30                                                                  |
| Meropenem                                  | 10                                                                  |
| Colistin                                   | 10                                                                  |
| Kanamycin (50 mg/ml in water)              | 50                                                                  |
| Streptomycin (50 mg/ml in water)           | 50                                                                  |
| Amoxicillin + Clavulanic Acid              | 30                                                                  |

3
