# Supplementary material
Source: PubMed Central journal article supplement (PMC3930308)
Supplement: ismej2013164x7.pdf [file ismej2013164x7.pdf]

1 Supplementary table S2: Metabolic pathways in epibiotic and periplasmic BALO predators.

| Species                                   | Periplasmic Predators                     |                                                                           | Epibiotic Predators                |                                       |
|-------------------------------------------|-------------------------------------------|---------------------------------------------------------------------------|------------------------------------|---------------------------------------|
|                                           | <i>B. bacteriovorus</i><br>HD100          | <i>B. marinus</i> SJ                                                      | <i>B. exovorus</i> JSS             | <i>M. aeruginosavorus</i><br>EPB      |
| <b>Glycolysis</b>                         | Complete                                  | Complete                                                                  | Complete                           | Complete                              |
| <b>Tricarboxylic Acid (TCA) Cycle</b>     | Complete                                  | Complete                                                                  | Complete                           | Complete                              |
| <b>Pentose Phosphate Pathway</b>          |                                           |                                                                           |                                    |                                       |
| -Oxidative                                | Not Produced                              | Not Produced                                                              | Not Produced                       | Not Produced                          |
| -Non-oxidative                            | Complete from D-ribose-5-phosphate        | Complete from D-ribose-5-phosphate                                        | Complete from D-ribose-5-phosphate | Complete from D-ribose-5-phosphate    |
| <b>Fatty Acid Biosynthesis</b>            |                                           |                                                                           |                                    |                                       |
| i) Initiation                             | Complete                                  | Complete                                                                  | Complete                           | Complete                              |
| ii) Saturated Elongation                  | Partial                                   | Partial                                                                   | Partial                            | Complete                              |
| iii) Unsaturated Elongation               | Very partial                              | Partial: missing fabA (E.C.5.3.3.14)                                      | Partial                            | Complete                              |
| <b>Fatty Acid Metabolism</b>              | Complete pathway for $\beta$ -oxidation I | Complete pathway for $\beta$ -oxidation I and oleate $\beta$ -oxidation I | Complete fatty acid degradation    | Only partial pathways for degradation |
| <b>Vitamins and Cofactor Biosynthesis</b> |                                           |                                                                           |                                    |                                       |
| i) Biotin                                 | Not Produced                              | Not Produced                                                              | Not Produced                       | Not Produced                          |
| ii) Riboflavin                            | Complete                                  | Complete                                                                  | Not Produced                       | Not Produced                          |
| iii) Thiamine                             | Not Produced                              | Not Produced                                                              | Not Produced                       | Not Produced                          |
| iv) Nicotinate                            | Complete (from L-aspartate)               | Complete (from L-aspartate)                                               | Complete (from L-aspartate)        | Very partial                          |
| v) Pantothenate and CoA Biosynthesis      | Produced                                  | Produced                                                                  | Complete                           | Absent                                |
| vi) Vitamin B6                            | Complete                                  | Complete                                                                  | Partial                            | Partial                               |

|                                |               |              |                 |                          |                           |
|--------------------------------|---------------|--------------|-----------------|--------------------------|---------------------------|
| vii)                           | Lipoic Acid   | Produced     | Complete        | Lipoid Acid Produced     | Partial                   |
| viii)                          | Folate        | Not produced | Almost complete | Partial                  | Absent                    |
| ix)                            | Retinol       | Not Produced | Not Produced    | Not Produced             | Not Produced              |
| <b>Amino Acid Biosynthesis</b> |               |              |                 |                          |                           |
| i)                             | Alanine       | Complete     | Complete        | Complete                 | Complete                  |
| ii)                            | Cysteine      | Complete     | Complete        | Complete                 | Complete                  |
| iii)                           | Aspartic Acid | Complete     | Complete        | Complete                 | Complete                  |
| iv)                            | Glutamic Acid | Complete     | Complete        | Complete                 | Complete                  |
| v)                             | Phenylalanine | Not Produced | Not produced    | Not Produced             | Produced                  |
| vi)                            | Glycine       | Complete     | Complete        | Complete                 | Complete                  |
| vii)                           | Histidine     | Not Produced | Not Produced    | Not Produced             | Not Produced              |
| viii)                          | Isoleucine    | Not Produced | Not Produced    | Not Produced             | Not Produced              |
| ix)                            | Lysine        | Complete     | Partial         | partial                  | Partial                   |
| x)                             | Leucine       | Not produced | Not Produced    | Not Produced             | Complete                  |
| xi)                            | Methionine    | Not Produced | Possibly        | Not Produced             | Not Produced              |
| xii)                           | Asparagine    | Not produced | Complete        | Not Produced             | Complete                  |
| xiii)                          | Proline       | Produced     | Produced        | Complete (using ProA)    | Complete (from glutamate) |
| xiv)                           | Glutamine     | Complete     | Complete        | Complete                 | Complete                  |
| xv)                            | Arginine      | Not Produced | Not Produced    | Not Produced             | Not Produced              |
| xvi)                           | Serine        | Produced     | Complete        | Complete (from pyruvate) | Complete                  |
| xvii)                          | Threonine     | Produced     | Produced        | Complete                 | Complete                  |
| xviii)                         | Valine        | Not Produced | Not Produced    | Not Produced             | Not Produced              |
| xix)                           | Tryptophan    | Not Produced | Not Produced    | Not Produced             | Produced                  |

|                                        |                         |                       |                       |                                   |             |
|----------------------------------------|-------------------------|-----------------------|-----------------------|-----------------------------------|-------------|
| xx)                                    | Tyrosine                | Not produced          | Not Produced          | Not Produced                      | Produced    |
| <b>de novo Purine Biosynthesis</b>     |                         |                       |                       |                                   |             |
| i)                                     | Inosine                 |                       |                       | Absent                            | Absent      |
| ii)                                    | dATP                    | Complete              | Complete              | Complete                          | Complete    |
| iii)                                   | dGTP                    | Complete              | Complete              | Complete                          | Complete    |
| <b>de novo Pyrimidine Biosynthesis</b> |                         |                       |                       |                                   |             |
| i)                                     | cCTP                    | Complete              | Complete              | Complete                          | Complete    |
| v)                                     | dTTP                    | Complete              | Complete              | Complete                          | Complete    |
| <b>Respiratory Chains</b>              |                         |                       |                       |                                   |             |
| i)                                     | Cytochrome B            | Present               | Present               | Not Present                       | Present     |
| ii)                                    | Cytochrome C            | Present               | Present               | Present                           | Present     |
| iii)                                   | Cytochrome D            | Not Present           | Not Present           | Not Present                       | Present     |
| iv)                                    | Cytochrome O            | Not Present           | Present               | Not Present                       | Not Present |
| v)                                     | Succinate dehydrogenase | Present               | Present               | Present                           | Present     |
| <b>Aerobic Metabolism</b>              |                         |                       |                       |                                   |             |
| i)                                     | Catalase                | Present               | Present               | ND                                | Present     |
| ii)                                    | Superoxide dismutase    | Present               | Present               | ND                                | Present     |
| iii)                                   | Peroxides               | Present               | Present               | ND                                | Present     |
| <b>Transporters</b>                    |                         |                       |                       |                                   |             |
| i)                                     | Amino acids/peptides    | Peptides, branched aa | Peptides, branched aa | Methionine, branched aa, peptides | Methionine  |
| ii)                                    | Sugars                  | Present               | Not Present           | Present                           | Present     |
| iv)                                    | Vitamins                | Thiamine              | B12                   | None                              | None        |

|                         |                             |                                                                                                                                        |                                                                                                   |                                                                               |                                                                                                             |
|-------------------------|-----------------------------|----------------------------------------------------------------------------------------------------------------------------------------|---------------------------------------------------------------------------------------------------|-------------------------------------------------------------------------------|-------------------------------------------------------------------------------------------------------------|
| iii)                    | Cations                     | Mg <sup>2+</sup> , Co <sup>2+</sup> , Fe <sup>3+</sup>                                                                                 | Mg <sup>2+</sup> , Co <sup>2+</sup> , metals, cations,                                            | Fe <sup>2+</sup> , Mg <sup>2+</sup> ,<br>Co <sup>2+</sup> , Na+,<br>"cations" | Fe <sup>2+</sup> , Mn <sup>2+</sup> , Co <sup>2+</sup> ,<br>NH <sub>4</sub> <sup>+</sup> , Mg <sup>2+</sup> |
| iv)                     | Anions                      | NO <sub>3</sub> <sup>-</sup> , phosphate,<br>phosphonate,<br>chromate                                                                  | Molybdate, phosphate,<br>phosphonate, arsenate                                                    | NO <sub>3</sub> <sup>-</sup> , phosphate,<br>phosphonate                      | HCO <sub>3</sub> <sup>-</sup> , NO <sub>2</sub> <sup>-</sup> ,<br>NO <sub>3</sub> <sup>-</sup> ; phosphate  |
| v)                      | Others                      | Spermidine/putrescine,<br>microcin, lipo-<br>oligosaccharide,<br>multidrug, solvent,<br>short chain fatty acids,<br>FtsX cell division | Microcin, lipo-<br>oligosaccharide,<br>lipopolysaccharide, lipoprotein,<br>antibiotic, nucleoside | Lipopolysaccharide,<br>multidrugs, solvent                                    | Lipopolysaccharide,<br>multidrug,<br>microcin, solvent,<br>FtsX cell division                               |
| <b>Siderophores</b>     |                             |                                                                                                                                        |                                                                                                   |                                                                               |                                                                                                             |
|                         | i) Aerobactin               | Produced                                                                                                                               | Produced                                                                                          | Not Produced                                                                  | Not Produced                                                                                                |
|                         | ii) siderophore transporter | Absent                                                                                                                                 | Present                                                                                           | present                                                                       | Absent                                                                                                      |
| <b>Reserve Material</b> |                             |                                                                                                                                        |                                                                                                   |                                                                               |                                                                                                             |
|                         | i) Polyhydroxyalkanoate     | Not Produced                                                                                                                           | Not Produced                                                                                      | Not Produced                                                                  | Not Produced                                                                                                |
|                         | ii) Glycogen                | Not Produced                                                                                                                           | Not Produced                                                                                      | Not Produced                                                                  | Not Produced                                                                                                |
|                         | iii) Polyphosphate          | Produced                                                                                                                               | Produced                                                                                          | Produced                                                                      | Not Produced                                                                                                |

2

3

4

5

6
